# Supplementary material
Source: PubMed Central journal article supplement (PMC3710125)

Supplemental Figure 1.

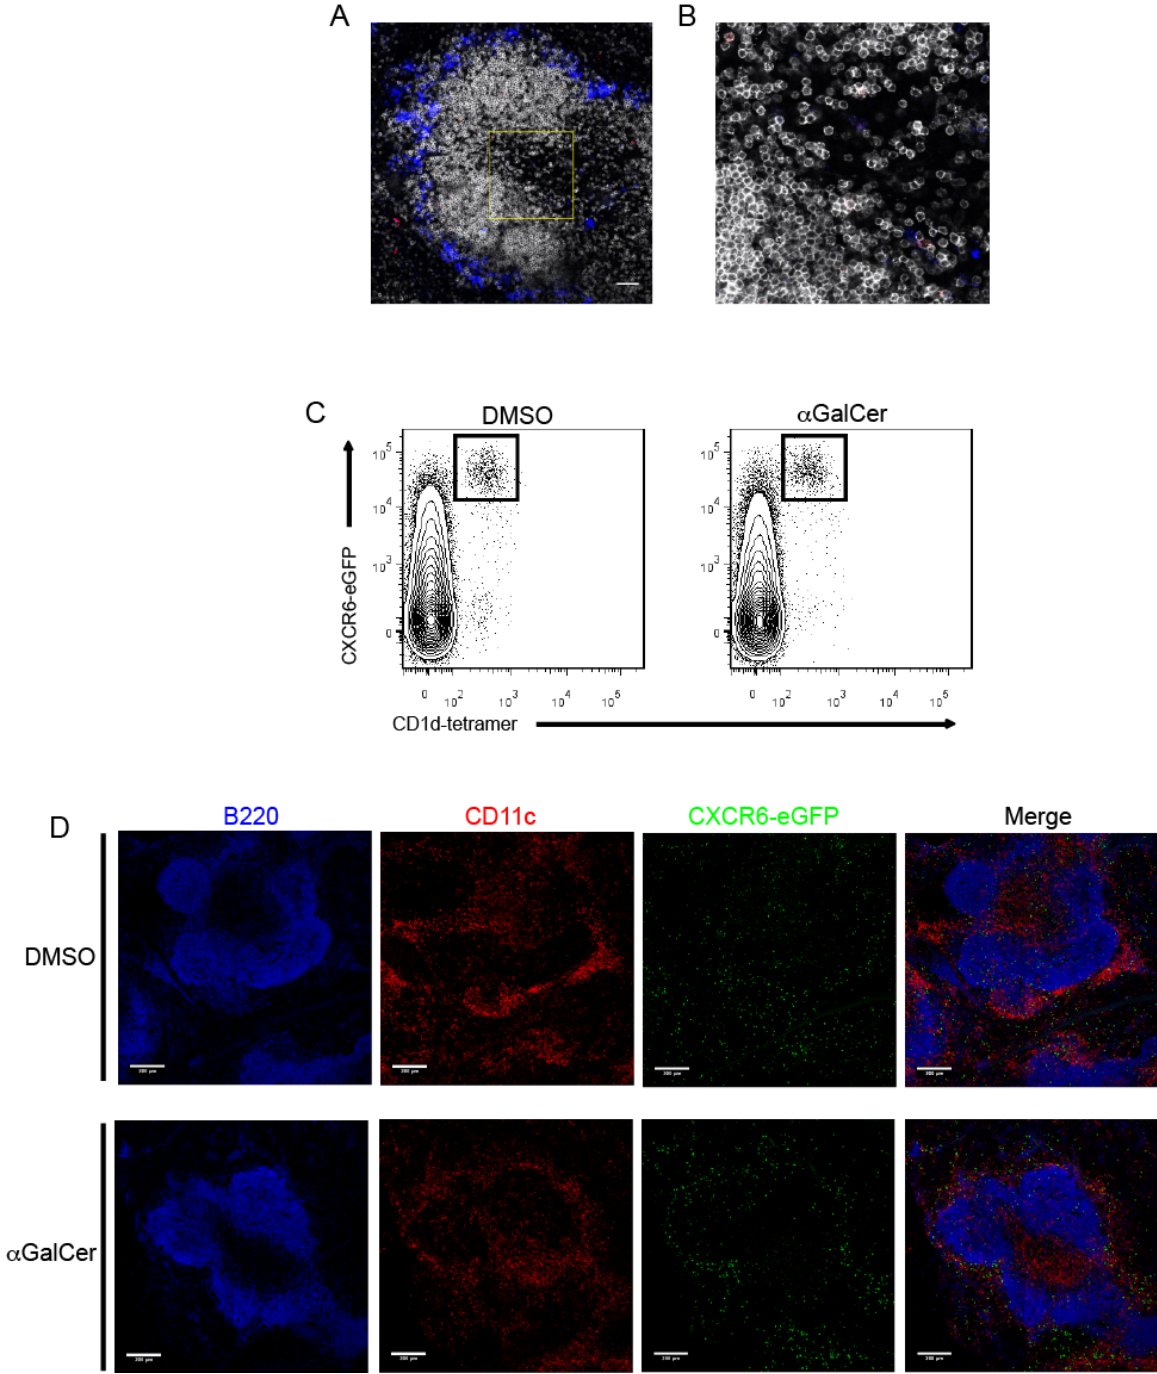

Supplement: NIHMS482289-supplement-2.pdf [file NIHMS482289-supplement-2.pdf]

Supplemental Figure 2.

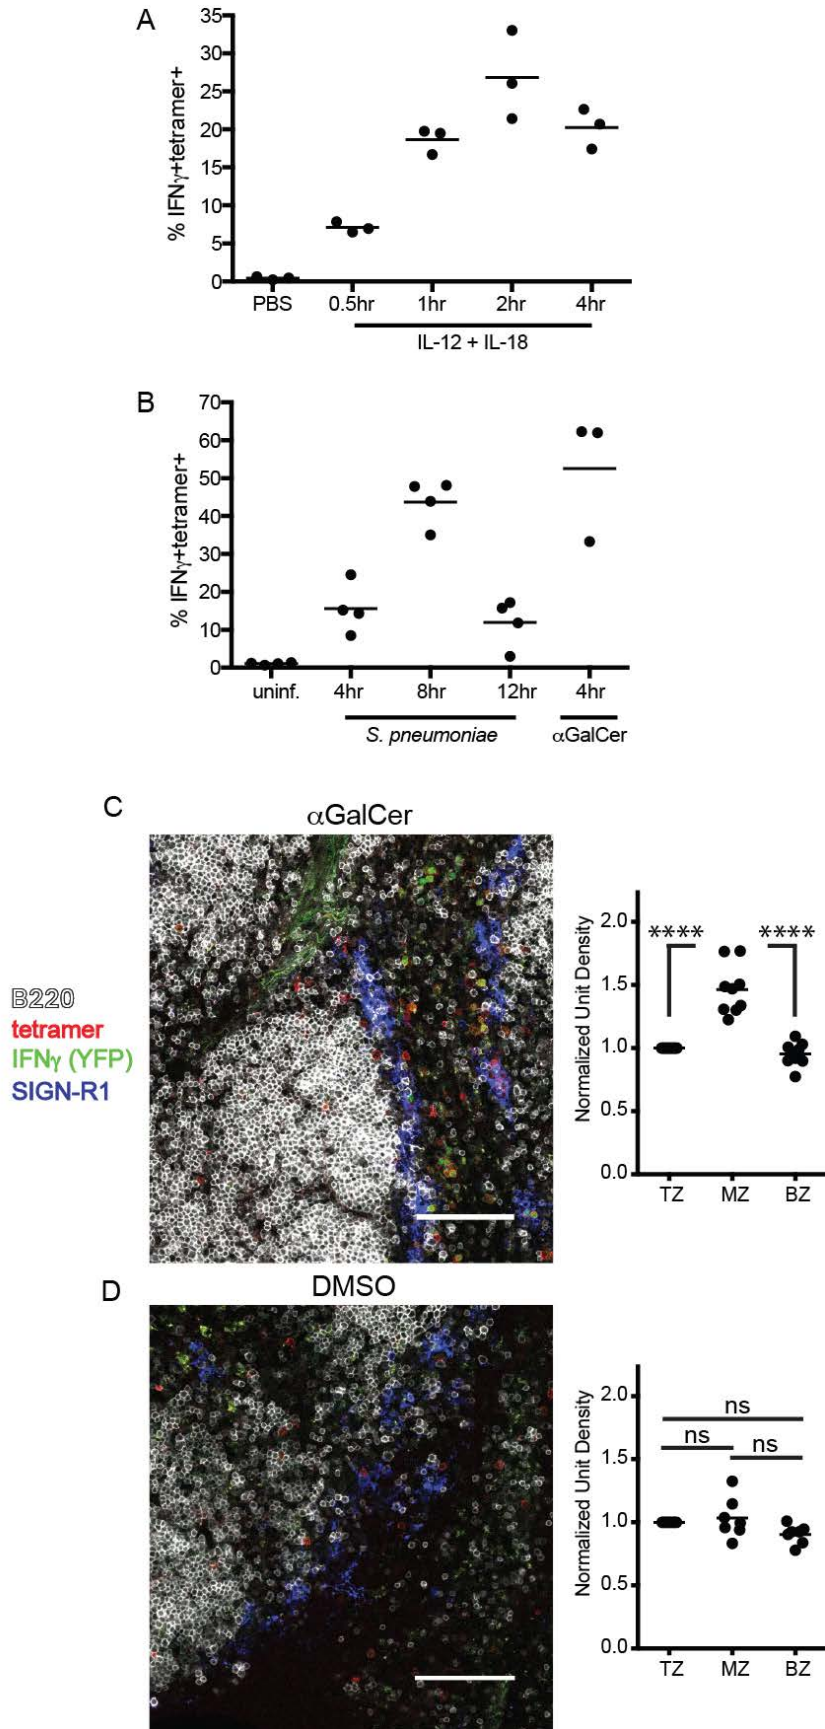

Supplement: NIHMS482289-supplement-3.pdf [file NIHMS482289-supplement-3.pdf]
